# Supplementary material
Source: publisher figshare collection journal article supplement (https://tandf.figshare.com/articles/dataset/_/4986458)
Supplement: Supplementary file 1 [file 2]

Table S1: Site specific details with soil properties and Light Use Efficiency

| Plantation | Silt % | Sand % | Gravel % | Clay % | LUE ( g C MJ <sup>-1</sup> ) | Average plantation coefficient (kc) |                 | Source            |
|------------|--------|--------|----------|--------|------------------------------|-------------------------------------|-----------------|-------------------|
|            |        |        |          |        |                              | Pre-<br>monsoon                     | Post<br>monsoon |                   |
| Teak       | 36.82  | 41.41  | 11.32    | 10.45  | 0.540<br>(Ahl et al,2004)    | Null                                | 2.01            | Somen et al,2008  |
| Eucalyptus | 22.3   | 36.56  | 28.01    | 13.13  | 0.52                         | 1.63                                | 2.81            | Somen et al,2008  |
| Poplar     | 47.5   | 26     | 16.15    | 26.5   | 0.73                         | 1.22                                | 2.31            | Guidi et al.,2008 |
| Mixed      | 24.55  | 42     | 22.05    | 10.45  | 0.75                         | 1.19                                | 1.57            | Somen et al,2008  |
